# Supplementary material
Source: PubMed Central journal article supplement (PMC9141095)
Supplement: NIHMS1806647-supplement-Appendices_1___2.pdf [file NIHMS1806647-supplement-Appendices_1___2.pdf]

SUPPLEMENTAL MATERIAL

Appendix 1. Congenital heart defect-related Centers for Disease Control and Prevention (CDC)-modified version of the British Pediatric Association (BPA) codes included in the Congenital Heart Survey To Recognize Outcomes, Needs, and well-being (CH STRONG)

| Severe Codes |                                                                                   |
|--------------|-----------------------------------------------------------------------------------|
| 745.000      | Common Truncus                                                                    |
| 745.010      | Aortic septal defect (ASD) / Aortopulmonary window                                |
| 745.100—     |                                                                                   |
| 745.190      | Transposition (all types)                                                         |
|              | 745.100 Transposition of great vessels, complete (no VSD)                         |
|              | Transposition of great vessels, incomplete (w/ VSD), Taussig                      |
|              | 745.110 Bing                                                                      |
|              | 745.120 Corrected transposition of great vessels, L transposition, vent inversion |
|              | 745.190 Unspecified transposition of great vessels                                |
| 745.200      | Tetralogy of Fallot                                                               |
| 745.210      | Fallot's pentalogy (tetralogy plus ASD)                                           |
| 745.300      | Single ventricle, common ventricle, cor triloculare biatriatum                    |
| 745.620      | Common atrioventricular canal with ventricular septal defect (VSD)                |
| 745.630      | Common atrioventricular canal                                                     |
| 745.680      | Other specified cushion defect                                                    |

|                        |                                                     |
|------------------------|-----------------------------------------------------|
| 745.690                | Endocardial cushion defect, NOS                     |
| 746.000                | Pulmonary valve atresia, hypoplasia                 |
| 746.100                | Tricuspid atresia and stenosis                      |
| 746.505                | Absence, atresia, or hypoplasia of mitral valve     |
| 746.700                | Hypoplastic Left Heart Syndrome (HLHS)              |
| 747.100—               |                                                     |
| 747.190                | Coarctation of the aorta (all types)                |
|                        | 747.100 Pre-ductal                                  |
|                        | 747.110 Post-ductal                                 |
|                        | 747.120 Ductal                                      |
| 747.200                | Aortic atresia (including pseudotruncus arteriosus) |
| 747.210                | Aortic hypoplasia                                   |
| 747.215—               |                                                     |
| 747.217,<br>or 747.285 | Interrupted aortic arch                             |
| 747.420                | Total Anomalous Pulmonary Venus Return (TAPVR)      |

#### Shunt + Valve Codes

|                                                                                               |                      |
|-----------------------------------------------------------------------------------------------|----------------------|
| 745.520                                                                                       | Lutembacher syndrome |
| 746.840                                                                                       | Trilogy of Fallot    |
| <i>Other cases will be in this category if have codes in both Shunt and Valve categories.</i> |                      |

## Shunt Codes

|                 |                                                                       |
|-----------------|-----------------------------------------------------------------------|
| 745.400—745.490 | Ventricular Septal Defect (VSD), (all types)                          |
| 745.400         | Roger's disease                                                       |
| 745.410         | Eisenmenger's syndrome                                                |
| 745.420         | Gerbode defect                                                        |
| 745.480         | Other specified ventricular septal defect                             |
| 745.490         | Ventricular septal defect, NOS                                        |
| 745.510         | Secundum aortic septal defect                                         |
| 745.580         | Other specified aortic septal defect                                  |
| 745.590         | Aortic septal defect, NOS                                             |
| 745.600         | Ostium primum defects                                                 |
| 745.610         | Single common atrium, cor triloculare biventriculare                  |
| 745.800         | Other bulbus cordis anomalies and anomalies of cardiac septal closure |
| 745.900         | Unspecified defect of septal closure                                  |
| 747.430         | Partial anomalous pulmonary venous return (PAPVR)                     |

## Valve Codes

|         |                                                  |
|---------|--------------------------------------------------|
| 746.010 | Pulmonary valve stenosis                         |
| 746.830 | Pulmonary infundibular stenosis                  |
| 746.080 | Other specified anomalies of the pulmonary valve |
| 746.090 | Unspecified anomaly of pulmonary valve           |

|         |                                                                            |
|---------|----------------------------------------------------------------------------|
| 746.200 | Ebstein anomaly                                                            |
| 746.300 | Aortic valve stenosis (includes valvar and subvalvar)                      |
| 747.220 | Supra-aortic stenosis (supra-valvar)                                       |
| 746.480 | Other specified anomalies of aortic valve (including aortic valve atresia) |
| 746.790 | Unspecified anomalies of aortic valve                                      |
| 746.500 | Congenital mitral stenosis                                                 |
| 746.900 | Unspecified anomalies of heart valves                                      |
| 746.995 | Pulmonic or pulmonary atresia, stenosis, or hypoplasia, NOS                |
| 747.300 | Pulmonary artery atresia, absence, or agenesis                             |
| 747.310 | Pulmonary artery atresia with septal defect                                |

| Other Codes |                                                    |
|-------------|----------------------------------------------------|
| 745.700     | Cor biloculare                                     |
| 746.820     | Cor triatriatum                                    |
| 746.881     | Hypoplastic left ventricle                         |
| 746.882     | Hypoplastic right heart/ ventricle (Uhl's disease) |
| 746.883     | Hypoplastic ventricle, NOS                         |
| 746.885     | Coronary artery anomaly                            |
| 746.887     | Other defects of the atria                         |
| 746.910     | Anomalous bands of heart                           |
| 746.920     | Acyanotic congenital heart disease, NOS            |

|                 |                                              |
|-----------------|----------------------------------------------|
| 746.930         | Cyanotic congenital heart disease, NOS       |
| 747.230—747.290 | Anomalies of aorta (all types)               |
| 747.230         | Persistent right aortic arch                 |
| 747.240         | Aneurysm of sinus of Valsalva                |
| 747.250         | Vascular ring (includes double aortic arch)  |
| 747.260         | Overriding aorta                             |
| 747.270         | Aortic aneurysm                              |
| 747.280         | Other specified anomalies of aorta           |
| 747.290         | Unspecified anomalies of aorta               |
| 747.400         | Stenosis of vena cava (inferior or superior) |
| 747.410         | Persistent left superior vena cava           |

NOS: Not otherwise specified

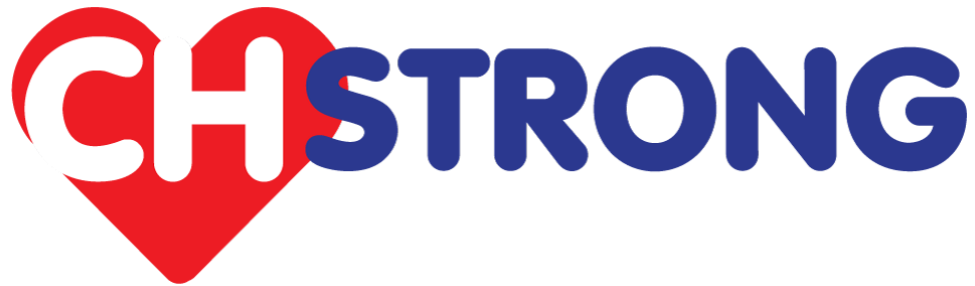

**Congenital Heart Survey To Recognize Outcomes, Needs, and well-being**

[ID STICKER HERE]

## BASIC INFORMATION

Any information you give will be confidential. You may skip any questions you do not want to answer.

1. Are you the person to whom the introduction letter was addressed?

- Yes → **Go to #4**  
 No

2. What is your relationship to the person to whom the letter was addressed?

- Partner/Spouse  
 Sibling  
 Parent  
 Other family member  
 Unrelated care giver  
 Other (*please specify*):

3. What is the primary reason that this person cannot complete the questionnaire?

- Deceased → **Go to #75 on page 13**  
 Physically unable  
 Mentally unable  
 Unavailable  
 Other (*please specify*):

4. As explained in the letter you received with this survey, we are contacting you about this survey because our records show that you have a congenital heart defect, which is a heart problem you were born with. We would like to ask you some questions about your heart problem.

***If you are completing this questionnaire for the addressee (the individual with the heart problem), please answer all questions with information about the addressee only.***

**What is the name of the heart problem that you were born with? *Mark all that apply.***

- |                                                                                                     |                                                                                                                                   |
|-----------------------------------------------------------------------------------------------------|-----------------------------------------------------------------------------------------------------------------------------------|
| <input type="checkbox"/> Aortic valve stenosis                                                      | <input type="checkbox"/> Tetralogy of Fallot (TOF)                                                                                |
| <input type="checkbox"/> Atrial septal defect (ASD)                                                 | <input type="checkbox"/> Transposition of the great arteries (TGA)                                                                |
| <input type="checkbox"/> Atrioventricular septal defect (AVSD) or Atrioventricular canal (AV canal) | <input type="checkbox"/> Tricuspid atresia                                                                                        |
| <input type="checkbox"/> Bicuspid aortic valve                                                      | <input type="checkbox"/> Truncus arteriosus                                                                                       |
| <input type="checkbox"/> Coarctation of aorta                                                       | <input type="checkbox"/> Ventricular septal defect (VSD)                                                                          |
| <input type="checkbox"/> Hypoplastic left heart syndrome (HLHS)                                     | <input type="checkbox"/> Other ( <i>please provide name</i> ):                                                                    |
| <input type="checkbox"/> Patent ductus arteriosus (PDA)                                             | <input type="text"/>                                                                                                              |
| <input type="checkbox"/> Pulmonary atresia                                                          | <input type="checkbox"/> Don't know/not sure                                                                                      |
| <input type="checkbox"/> Pulmonary valve stenosis                                                   | <input type="checkbox"/> No heart problem that I know of ( <i>please answer remaining questions to the best of your ability</i> ) |
| <input type="checkbox"/> Single ventricle (double inlet left ventricle)                             |                                                                                                                                   |

## SURGERIES

Next, we will ask you questions about any surgeries you may have had on your heart. Heart surgery will result in scars on the middle of your chest, side, or back. Surgeries that occur after the first surgery may use the same scar or create a new scar.

5. Have you ever had surgery for the heart problem you were born with?

- Yes
- No → **Go to #10**
- Don't know/not sure → **Go to #10**

Approximately how many heart surgeries have you had during each of the following age periods? *Provide number or mark appropriate box.*

|                                        | # of Heart Surgeries<br>(enter "0" if no heart surgery) | Had heart surgery but don't know how many | Don't know/not sure      |
|----------------------------------------|---------------------------------------------------------|-------------------------------------------|--------------------------|
| 6. When you were less than 1 year old? | <input type="text"/>                                    | <input type="checkbox"/>                  | <input type="checkbox"/> |
| 7. When you were 1-5 years old?        | <input type="text"/>                                    | <input type="checkbox"/>                  | <input type="checkbox"/> |
| 8. When you were 6-17 years old?       | <input type="text"/>                                    | <input type="checkbox"/>                  | <input type="checkbox"/> |
| 9. When you were 18 years or older?    | <input type="text"/>                                    | <input type="checkbox"/>                  | <input type="checkbox"/> |

## HEALTH INSURANCE

The next few questions are about health insurance. When you answer these questions, please think about health insurance obtained through employment or purchased directly, as well as government programs like Medicare and Medicaid that provide medical care or help pay medical bills.

10. Are you covered by health insurance or some other kind of health care plan?

- Yes
- No → **Go to #13 on page 3**
- Don't know/not sure → **Go to #13 on page 3**



**11. What kind of health insurance or health care coverage do you have? Include those that pay for only one type of service (nursing home care, accidents, or dental care). Exclude private plans that only provide extra cash while hospitalized. If you have more than one kind of health insurance, mark all that apply.**

- |                                                                           |                                                                                    |
|---------------------------------------------------------------------------|------------------------------------------------------------------------------------|
| <input type="checkbox"/> Private health insurance                         | <input type="checkbox"/> State-sponsored health plan                               |
| <input type="checkbox"/> Medicare                                         | <input type="checkbox"/> Other government program                                  |
| <input type="checkbox"/> Medi-gap                                         | <input type="checkbox"/> Single service plan (e.g., dental, vision, prescriptions) |
| <input type="checkbox"/> Medicaid (state-specific names)                  | <input type="checkbox"/> Other ( <i>please provide name</i> ):                     |
| <input type="checkbox"/> SCHIP (CHIP/children's health insurance program) | <input type="checkbox"/> Don't know/not sure                                       |
| <input type="checkbox"/> Military health care (Tricare/VA/CHAMP-VA)       |                                                                                    |
| <input type="checkbox"/> Indian Health Service                            |                                                                                    |

**12. In the past 12 months, was there any time when you did not have any health insurance coverage?**

- Yes
- No
- Don't know/not sure

**13. In regard to your health insurance or health care coverage, how does it compare to a year ago?**

- Better
- Worse
- About the same
- Don't know/not sure

**14. Have you ever been denied health insurance?**

- Yes
- No
- Don't know/not sure

**15. Have you ever received disability benefits (do not include Medicaid)?**

- Yes
- No
- Don't know/not sure

**16. Have you ever been denied disability benefits (do not include Medicaid)?**

- Yes
- No
- Don't know/not sure

**17. Have you ever been unable to pay or delayed payment for medical care, including medications, hospital stays, and doctors' visits?**

- Yes
- No
- Don't know/not sure

18. Was there a time in the past 12 months when you needed to see a doctor but could not because of cost?

- Yes
- No
- Don't know/not sure

## HEALTH CARE

The next set of questions ask about your use of health care.

19. What kind of place do you go most often when you are sick or need advice about your health -- a clinic, doctor's office, emergency room, or some other place? (*Please choose the place you go most often.*)

- Clinic or health center
- Doctor's office or HMO
- Hospital emergency room
- Hospital outpatient department
- Some other place
- Don't go to one place most often → *Go to #23 on page 5*
- Don't know/not sure → *Go to #20*

20. Have you informed the place you go most often when you are sick or need advice about your health that you were born with a heart problem?

- Yes
- No

21. At any time in the past 12 months did you change the place where you usually go for health care?

- Yes
- No → *Go to #23 on page 5*
- Don't know/not sure → *Go to #23 on page 5*

22. Was this change for a reason related to health insurance?

- Yes
- No
- Don't know/not sure

**23. During the past 12 months, how many times have you gone to a hospital emergency room about your own health (this includes emergency room visits that resulted in hospital admission)?**

- None
- 1
- 2-3
- 4-5
- 6-7
- 8-9
- 10-12
- 13-15
- 16 or more
- Don't know/not sure

**24. During the past 12 months, how many separate times have you stayed overnight in the hospital for at least one night for any reason? (Only include times when you were admitted to the hospital. Do not include times where you were in the emergency room overnight.)**

- None → *Go to #26 on page 6*
- 1
- 2-3
- 4-5
- 6-7
- 8-9
- 10-12
- 13-15
- 16 or more
- Don't know/not sure

**25. Of these times that you stayed overnight in the hospital for at least one night in the past 12 months, how many were because of your heart problem or complications from your heart problem?**

- None
- 1
- 2-3
- 4-5
- 6-7
- 8-9
- 10-12
- 13-15
- 16 or more

26. In the past 12 months, approximately how many times have you visited the office of any health care provider, such as a doctor, nurse, or physician's assistant, for any reason pertaining to your health? Do not include dentists.

- None → **Go to #28**
- 1
- 2-3
- 4-5
- 6-7
- 8-9
- 10-12
- 13-15
- 16 or more

## HEART DOCTORS

The next few questions ask about visits to a heart doctor (cardiologist) or cardiology clinic.

27. How many health care provider visits were with a heart doctor or at a cardiology clinic (clinic that only see patients with heart problems) in the past 12 months?

Please enter a number (enter "0" if none with a heart doctor or at a cardiology clinic)

28. When is the last time you saw a heart doctor?

- Less than 1 year
- 1-2 years
- 3-5 years
- More than 5 years → **Go to #30**
- Never seen one → **Go to #30**

29. Who are the majority of patients that your primary heart doctor usually sees?

- Children and adolescents (pediatric cardiologist)
- Adults who have had their heart problem since birth (adult congenital heart cardiologist)
- Adults (adult cardiologist)

**Go to #31 on page 7**

30. If you have not seen a heart doctor in the last 5 years or ever, why? **Mark all that apply.**

- Felt well
- Did not think I needed to see a heart doctor
- Doctor told me I no longer needed to see a heart doctor
- My parents stopped taking me
- Changed or lost my insurance
- Moved to a different city or town
- Did not like my heart doctor
- Couldn't find a heart doctor
- Other

31. When you were a teenager or young adult, did a health care provider ever discuss with you the need to see a heart doctor throughout your life?

- Yes
- No

## GENERAL HEALTH

The next few questions ask about your physical and mental health and your interactions with others.

32. Have you ever been told by a doctor or other health professional that you had any of the following conditions? *(Mark all that apply):*

- |                                                                                                                                                                                                                                                                                                                                                                                                                                                                                                                                     |                                                                                                                                                                                                                                                                                                                                                                                                                                                                                                                                                                                           |
|-------------------------------------------------------------------------------------------------------------------------------------------------------------------------------------------------------------------------------------------------------------------------------------------------------------------------------------------------------------------------------------------------------------------------------------------------------------------------------------------------------------------------------------|-------------------------------------------------------------------------------------------------------------------------------------------------------------------------------------------------------------------------------------------------------------------------------------------------------------------------------------------------------------------------------------------------------------------------------------------------------------------------------------------------------------------------------------------------------------------------------------------|
| <ul style="list-style-type: none"> <li><input type="checkbox"/> Diabetes or sugar diabetes</li> <li><input type="checkbox"/> Obstructive sleep apnea</li> <li><input type="checkbox"/> Cancer or a malignancy of any kind</li> <li><input type="checkbox"/> Congestive heart failure</li> <li><input type="checkbox"/> Cardiac dysrhythmias or irregular heart beat</li> <li><input type="checkbox"/> A mood disorder or depression</li> <li><input type="checkbox"/> A heart attack (also called myocardial infarction)</li> </ul> | <ul style="list-style-type: none"> <li><input type="checkbox"/> A stroke</li> <li><input type="checkbox"/> Asthma</li> <li><input type="checkbox"/> An ulcer (stomach, duodenal or peptic ulcer)</li> <li><input type="checkbox"/> Arthritis, gout, lupus, or fibromyalgia</li> <li><input type="checkbox"/> Hypertension, also called high blood pressure</li> <li><input type="checkbox"/> Other <i>(please specify)</i>:<br/> <div style="border: 1px solid black; height: 20px; width: 100%; margin-top: 5px;"></div> </li> <li><input type="checkbox"/> None of the above</li> </ul> |
|-------------------------------------------------------------------------------------------------------------------------------------------------------------------------------------------------------------------------------------------------------------------------------------------------------------------------------------------------------------------------------------------------------------------------------------------------------------------------------------------------------------------------------------|-------------------------------------------------------------------------------------------------------------------------------------------------------------------------------------------------------------------------------------------------------------------------------------------------------------------------------------------------------------------------------------------------------------------------------------------------------------------------------------------------------------------------------------------------------------------------------------------|

**Mark the box that corresponds to your answer for questions 33 – 38.**

|                                                                                                                                                                                                                                              | Excellent                | Very Good                | Good                     | Fair                     | Poor                     |
|----------------------------------------------------------------------------------------------------------------------------------------------------------------------------------------------------------------------------------------------|--------------------------|--------------------------|--------------------------|--------------------------|--------------------------|
| <b>33. In general, would you say your health is:</b>                                                                                                                                                                                         | <input type="checkbox"/> |
| <b>34. In general, would you say your quality of life is:</b>                                                                                                                                                                                | <input type="checkbox"/> |
| <b>35. In general, how would you rate your physical health?</b>                                                                                                                                                                              | <input type="checkbox"/> |
| <b>36. In general, how would you rate your mental health, including your mood and your ability to think?</b>                                                                                                                                 | <input type="checkbox"/> |
| <b>37. In general, how would you rate your satisfaction with your social activities and relationships?</b>                                                                                                                                   | <input type="checkbox"/> |
| <b>38. In general, please rate how well you carry out your usual social activities and roles (this includes activities at home, at work and in your community, and responsibilities as a parent, child, spouse, employee, friend, etc.)?</b> | <input type="checkbox"/> |

39. To what extent are you able to carry out your everyday physical activities such as walking, climbing stairs, carrying groceries, or moving a chair?

- Completely
- Mostly
- Moderately
- A little
- Not at all

40. In the past 7 days, how often have you been bothered by emotional problems such as feeling anxious, depressed or irritable?

- Never
- Rarely
- Sometimes
- Often
- Always

41. In the past 7 days, how would you rate your fatigue on average?

- None
- Mild
- Moderate
- Severe
- Very severe

42. In the past 7 days, how would you rate your pain on average? *Mark the box that corresponds to your answer.*

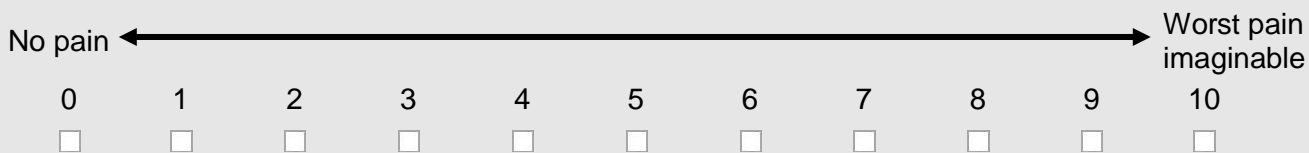

Over the last 2 weeks, how often have you been bothered by any of the following problems? *Mark the box that corresponds to your answer.*

|                                                 | Not at all               | Several days             | More than half the days  | Nearly every day         |
|-------------------------------------------------|--------------------------|--------------------------|--------------------------|--------------------------|
| 43. Little interest or pleasure in doing things | <input type="checkbox"/> | <input type="checkbox"/> | <input type="checkbox"/> | <input type="checkbox"/> |
| 44. Feeling down, depressed, or hopeless        | <input type="checkbox"/> | <input type="checkbox"/> | <input type="checkbox"/> | <input type="checkbox"/> |

With the next set of questions, we want to learn whether you have physical, mental, or emotional conditions that cause serious difficulties with your daily activities.

45. Are you deaf or do you have serious difficulty hearing?

- Yes
- No

46. Are you blind or do you have serious difficulty seeing, even when wearing glasses?

- Yes
- No

47. Because of a physical, mental, or emotional condition, do you have serious difficulty concentrating, remembering, or making decisions?

- Yes
- No

48. Do you have serious difficulty walking or climbing stairs?

- Yes
- No

49. Do you have difficulty dressing or bathing?

- Yes
- No

50. Because of a physical, mental, or emotional condition, do you have difficulty doing errands alone such as visiting a doctor's office or shopping?

- Yes
- No

Please rate how concerned you are about the following.

|                                      | Not at all concerned     | Not very concerned       | Somewhat concerned       | Very concerned           |
|--------------------------------------|--------------------------|--------------------------|--------------------------|--------------------------|
| 51. Your future health               | <input type="checkbox"/> | <input type="checkbox"/> | <input type="checkbox"/> | <input type="checkbox"/> |
| 52. Your ability to have children    | <input type="checkbox"/> | <input type="checkbox"/> | <input type="checkbox"/> | <input type="checkbox"/> |
| 53. Your overall <u>heart</u> health | <input type="checkbox"/> | <input type="checkbox"/> | <input type="checkbox"/> | <input type="checkbox"/> |

54. Have you completed an advance health care directive, living will, or health care power of attorney?

- Yes
- No
- Don't know/not sure

## HEIGHT AND WEIGHT

Questions 55 – 57 ask about your height and weight.

55. How tall are you without shoes?

Height in feet and inches (*please give number*)

ft.

in.

56. How much do you weigh without clothes or shoes? If you are currently pregnant, how much did you weigh before your pregnancy?

Weight in pounds (*please give number*)

pounds

57. What is the most you have ever weighed in your life? (*Do not include any times when you were pregnant.*)

Weight in pounds (*please give number*)

pounds

## REPRODUCTIVE HEALTH

This section is for women only. If you are a man, go to #65 on page 11.

Now we will ask you questions about your reproductive health in relation to your heart problem and any pregnancies you have had or are planning.

58. Has a doctor, nurse, or other health care worker ever talked with you about special concerns about becoming pregnant because of your heart problem?

- Yes  
 No

59. Has a doctor, nurse, or other health care worker ever advised you to avoid pregnancy because of your heart problem?

- Yes  
 No

60. Has a doctor, nurse or other health professional ever talked with you about the safest type of birth control or contraception to use because of your heart problem?

- Yes  
 No

61. Have you ever delayed or avoided getting pregnant because of concerns about your health in relation to your heart problem?

- Yes  
 No

62. Have you ever been pregnant?

- Yes  
 No → *Go to #65 on page 11*  
 Don't know/not sure → *Go to #65 on page 11*

63. How many times have you been pregnant?

Please enter a number

64. How many times have you given birth?

Please enter a number (*enter "0" if never given birth*)



## RECORD CONFIRMATION

Now we would like to confirm the information we have in our records and understand how people who completed the survey differ from other people born with a heart problem. Similar to all questions in this survey, any information you give will be confidential. You may skip any questions you do not want to answer. If you are not the person to whom the letter was addressed, please answer with information about the addressee only (that is, the person to whom the introduction letter was addressed).

**65. Do you consider yourself to be Hispanic or Latino?**

- Yes
- No

**66. What race or races do you consider yourself to be? *One or more categories may be selected.***

- American Indian or Alaskan Native
- Asian
- Black or African American
- Native Hawaiian or Pacific Islander
- White

**67. How many times have you been married (or lived as married)?**

Please enter a number (*enter "0" if never been married or lived as married*)

## EDUCATION AND WORK HISTORY

Questions 68 – 73 ask about your education and work history.

**68. What is the highest degree or grade you have completed?**

- Never attended school or only attended kindergarten
- Less than 9th grade
- 9th to 12th grade, no diploma
- High school graduate, GED, or alternative
- Some college, no degree
- Associate degree
- Bachelor's degree
- Graduate or professional degree
- Don't know/not sure

**69. In elementary, junior, or high school were you ever in a special education program? *Mark all that apply.***

- Special education
- Advanced placement
- Homebound education
- Not in any of these programs → **Go to #71**
- Don't know/not sure → **Go to #71**

**70. If you were in a special education program, what grades were you in at the time? *Mark all that apply.***

- Kindergarten-3rd grade
- 4th-6th grade
- 7th-12th grade
- Don't know/not sure

**71. During the last 12 months, did you work for pay at any time at a job or business? *Mark all that apply.***

- Yes – Full time
- Yes – Part time
- No

**72. Has your health kept you from serving in military service or from doing the type of work that you want?**

- Yes
- No
- Still in school

**73. During the last 12 months, approximately how many days of school or work did you miss because of illness?**

Please enter a number  
(enter "0" if did not miss school or work because of illness in last 12 months)

- I do not attend school nor do I work for pay.

**74. For future planning, what type of information or help do you think should be available to people born with heart problems?**

**Please continue to the next page.**

## CONTACT INFORMATION

Finally, we would like some information from you to confirm our records. If you are not the person to whom the letter was addressed, please answer with information about the addressee only (that is, the person to whom the introduction letter was addressed).

75. What name were you given at birth? Please enter both first and last name.

(Please print)

76. If your name has changed since birth, what is your current name? Please enter both first and last name.

(Please print)

77. What is your date of birth?

mm

dd

yyyy

We want to thank you again for participating in this survey. As the survey progresses, we would like to provide you updates about what we learn. Also, the CDC may conduct similar surveys in the future, and would like to offer you an opportunity to participate. Please remember that, if you provide your contact information now, you may change your mind and decline participation in the future.

78. If you would like to receive periodic updates on the progress and results of this survey, please provide your email address.

Email address  
(please print)

79. May we contact you in the future to participate in similar surveys?

Yes

No → *Go to the end*

80. Please provide your current mailing address and/or email address, depending on how you would like to be contacted. (please print)

Street address

City

State

Zip

Email address

81. It would be helpful if you could provide us with the name and address of someone who could give us your new address in case you decide to move in the future. We would contact this person for your new address only if we are unable to reach you at your home address and/or email address. (please print)

Street address

City

State

Zip

Email address

**Thank you for your time. It is truly appreciated.**

**[ID STICKER HERE]**

**Please return this questionnaire in the provided postage-paid envelope.**

**If you have lost your envelope, please return to:**

Centers for Disease Control and Prevention

4770 Buford Hwy

Mailstop E-86 (Attn: Sherry Farr)

Atlanta, GA 30341

**If you have any questions or comments, please visit our website:**

[www.chstrong.org](http://www.chstrong.org)

**or contact:**

The CH STRONG Project Manager at

[info@chstrong.org](mailto:info@chstrong.org) or (800) 586-5505

*Public reporting burden of this collection information is estimated to average 20 minutes, including completing and reviewing the collection of information. An agency may not conduct or sponsor, and a person is not required to respond to a collection of information unless it displays a currently valid OMB control number. Send comments regarding this burden estimate or any other aspect of this collection information, including suggestions for reducing this burden to CDC/ATSDR Reports Clearance Officer, 1600 Clifton Road NE, MS D-74, Atlanta, GA 30333: ATTN: PRA (0920-1122).*
